# Supplementary material for: As2S3, As2Se3 and As2Te3 nanosheets: superstretchable semiconductors with anisotropic carrier mobilities and optical properties
Source: Royal Society of Chemistry journal article supplement (doi:10.1039/c9tc05904k), 2019-12-30
Supplement: c9tc05904k1.pdf [file c9tc05904k1.pdf]

## Supporting Information

### **As<sub>2</sub>S<sub>3</sub>, As<sub>2</sub>Se<sub>3</sub> and As<sub>2</sub>Te<sub>3</sub> nanosheets: Superstretchable semiconductors with anisotropic carrier mobilities and optical properties**

Bohayra Mortazavi<sup>\*a</sup>, Fazel Shojaei<sup>b</sup>, Maryam Azizi<sup>b</sup>, Timon Rabczuk<sup>c</sup> and Xiaoying Zhuang<sup>c</sup>

*<sup>a</sup>Institute of Continuum Mechanics, Leibniz Universität Hannover, Appelstraße 11,  
30157 Hannover, Germany.*

*<sup>b</sup>School of Nano Science, Institute for Research in Fundamental Sciences (IPM),  
19395-5531 Tehran, Iran.*

*<sup>c</sup>College of Civil Engineering, Department of Geotechnical Engineering,  
Tongji University, Shanghai, China.*

\*E-mail: [bohayra.mortazavi@gmail.com](mailto:bohayra.mortazavi@gmail.com)

1. Atomic structures in VASP POSCAR format.
- 2- AIMD results for the thermal stability.
- 3- PBE results for the electronic band structures of monolayers with and without SOC.
- 4- HSE06 results for the electronic band structures of bulk systems.
- 5- Charge density distributions of VBM and CBM states of As<sub>2</sub>Se<sub>3</sub> and As<sub>2</sub>Te<sub>3</sub> monolayers.

# 1. Atomic structures in VASP POSCAR format.

## As<sub>2</sub>S<sub>3</sub> Single-layer

```
1.0000000000000000
  4.4565478770785676    0.0000000000000000    0.0000000000000000
  0.0000000000000000    11.3586428131330397    0.0000000000000000
  0.0000000000000000    0.0000002190398780    16.0000000000000000
As    S
  4      6
Direct
  0.1470184054197524    0.9776839827368167    0.6887287834054856
  0.6470185841413943    0.4776834832616674    0.7790583578762966
  0.1469763350112658    0.2662003801634338    0.6887857330475007
  0.6469778898592778    0.7662009364405205    0.7790015304777591
  0.9866464694417696    0.9089773362034305    0.8151821001991848
  0.4866404976576784    0.4089780183359392    0.6526051852682671
  0.4866654382906487    0.8349020606950012    0.6525363747958466
  0.9866695313801641    0.3349025991376285    0.8152510745476576
  0.4455842341161372    0.1219276070633198    0.7472568477822522
  0.9455816968064539    0.6219274337906382    0.7205293878497953
```

## As<sub>2</sub>S<sub>3</sub> Double-layer

```
1.0000000000000000
  4.3783708174226312    0.0000000000000000    0.0000000000000000
  0.0000000000000000    11.4586199205554848    0.0000000000000000
  0.0000000000000000    0.0000000000000000    32.0000000000000000
As    S
  8     12
Direct
  0.1476807229525636    0.9764001531148351    0.0821023790869207
  0.8866680497627411    0.0238772665910248    0.2827966721130776
  0.3845476789411656    0.5206238787009527    0.2366695950008403
  0.6498024329920845    0.4796540133580149    0.1282295078658254
  0.1467759572848243    0.2626517593597238    0.0855045099745444
  0.8875738457144559    0.7376260487057881    0.2793945690254456
  0.3915113425880539    0.2377367875308832    0.2388101260614465
  0.6428382800197165    0.7625410205346216    0.1260890085718868
  0.0440406091334183    0.0980180727110716    0.2204024687257566
  0.9903087721601976    0.9022595044164765    0.1444966103075791
  0.4903251986279764    0.4035568312536605    0.0659180015128657
  0.5440247331297903    0.5967210188085651    0.2989811172537996
  0.4900123471912655    0.8351999193980839    0.0626270828955719
  0.5443371209495235    0.1650779411413145    0.3022720080377560
  0.0433574409834475    0.6631311655411537    0.2163932380246875
  0.9909910420252519    0.3371466214819690    0.1485058568753162
  0.5871515494438349    0.8820153259917826    0.2504388159414133
  0.4471965794790087    0.1182625660671708    0.1144602551252533
  0.9482540911220213    0.6192453168391492    0.0965388319792146
  0.0860949520725384    0.3810324912263557    0.2683602390874521
```

## 1.2 AS2Se3 Single-layer

```
1.0000000000000000
  4.4329380980850432    0.0000000000000000    0.0000000000000000
  0.0000000000000000    12.0962864784322601    0.0000000000000000
  0.0000000000000000    0.0000000000000000    16.0000000000000000
As   Se
  4     6
Direct
0.1391577113197329    0.9820766577777462    0.7094611954566901
0.6388662362776714    0.4821039964613121    0.7943627316320843
0.1380285587681058    0.2619229220143922    0.7104187158773172
0.6384230657526899    0.7619271393894564    0.7934272775622162
0.9870913661965659    0.9053635920966059    0.8422273659281956
0.4867017030485243    0.4053654239248701    0.6616115766589203
0.4874966120760078    0.8385578428978278    0.6605154279984546
0.9870802902607068    0.3385552440965114    0.8433304986732750
0.4632864370828500    0.1217573585943228    0.7768619366632663
0.9635019706516559    0.6217207437508208    0.7269983208620872
```

## As2Se3 Double-layer

```
1.0000000000000000
  4.3601426900604530    0.0000000000000000    0.0000000000000000
  0.0000000000000000    12.1836960300425350    0.0000000000000000
  0.0000000000000000    0.0000000000000000    30.0000000000000000
As   Se
  8    12
Direct
0.1290778006839928    0.9833715911468249    0.0842022324832422
0.9081803132203292    0.0167657163496198    0.2990605508024734
0.4066191997568521    0.5126733100829902    0.2499000769787249
0.6306402455322430    0.4874645065007194    0.1333627531641222
0.1238445915157327    0.2633637581923829    0.0903481208382409
0.9134145824649467    0.7367740192181322    0.2929146667331913
0.4201497822435694    0.2376830360935972    0.2548118460142340
0.6171091202118224    0.7624547608624493    0.1284510096643395
0.0565120395877425    0.0985921407657860    0.2289730677670713
0.9807468077818502    0.9015453429689680    0.1542897282686516
0.4780413743397016    0.4048923182730638    0.0634930817049612
0.5592178900771164    0.5952454199642568    0.3197697654378980
0.4818282966266096    0.8422254200918825    0.0569453659559240
0.5554305023802470    0.1579124161194831    0.3263174471512134
0.0575561271098335    0.6560601433763223    0.2217837937451063
0.9797016087844457    0.3440776340341857    0.1614790278620407
0.5826787251213347    0.8789199206051984    0.2595453877073876
0.4545787294883667    0.1212179351517057    0.1237173998640377
0.9517384079984404    0.6219949765892182    0.0938867201642558
0.0855198546809182    0.3781428008212898    0.2893760333357500
```

### 1.3 As<sub>2</sub>Te<sub>3</sub> Single-layer

```
1.0000000000000000
  4.4586902569312423    0.0000000000000000    0.0000000000000000
  0.0000000000000000    13.1148798657304209    0.0000000000000000
  0.0000000000000000    0.0000000000000000    16.0000000000000000
As    Te
  4      6
Direct
0.1236157189792877    0.9858096511681538    0.6945001095466310
0.6236253649356485    0.4858073993371050    0.7732886945177313
0.1236754961633295    0.2580628461431047    0.6944478802677878
0.6236556575417254    0.7580628167288381    0.7733367520809367
0.9927269230368125    0.8999795028050741    0.8364194578146922
0.4927573983522038    0.3999735791446213    0.6313692101721884
0.4927130572048100    0.8439005761353755    0.6314245877740845
0.9927175882574986    0.3438908626917723    0.8363623665739865
0.4801517226618088    0.1219475665441792    0.7726713461316166
0.9801402532005312    0.6219488813383904    0.6951149106828183
```

### As<sub>2</sub>Te<sub>3</sub> Double-layer

```
1.0000000000000000
  4.3911023379122733    0.0000000000000000    0.0000000000000000
  0.0000000000000000    13.1851312463480443    0.0000000000000000
  0.0000000000000000    0.0000000000000000    32.0000000000000000
As    Te
  8     12
Direct
0.1151653011780240    0.9892635289554192    0.0718186530081866
0.9339983631709075    0.0106535007461943    0.2872536110251431
0.4336164326067333    0.5051965916502326    0.2360555481191540
0.6155485924441280    0.4947210170604635    0.1230167795141739
0.0967919078861499    0.2660654309349866    0.0836020412872074
0.9523728946241050    0.7338520519631615    0.2754702624794589
0.4585572468914805    0.2358143343944263    0.2445340953978032
0.5906073069614735    0.7641031485037288    0.1145382560688617
0.0646752919648605    0.0981970756723882    0.2157250009287850
0.9844890854357757    0.9017201197188456    0.1433472869712134
0.4782063243940797    0.4059569825600278    0.0525161597865846
0.5709584910647933    0.5939605183544145    0.3065561757800808
0.4913627369292897    0.8484837489281887    0.0415547885851879
0.5578016075511414    0.1514338597825073    0.3175175270814776
0.0654214515354425    0.6477214999464991    0.2029214060864675
0.9837419382589587    0.3521959650107362    0.1561508976801989
0.5799519671367364    0.8762874024763363    0.2430955332601172
0.4692110693141061    0.1236301972639069    0.1159767625398800
0.9648484226824081    0.6245952937041608    0.0790756185371393
0.0843156079587004    0.3753222430921141    0.2799966296295295
```

2- AIMD results for the thermal stability.

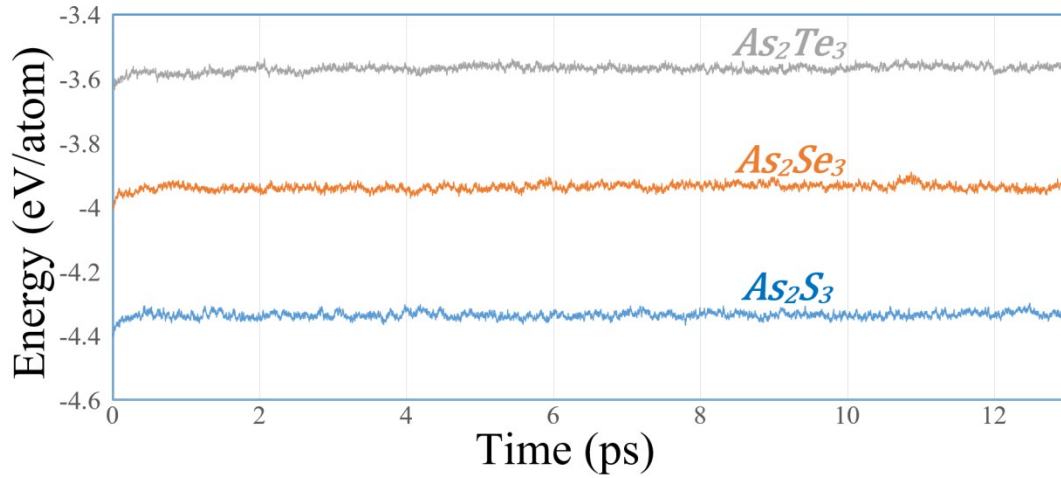

**Fig. S1**, Fluctuation of per atoms energy during the AIMD simulations at 500 K.

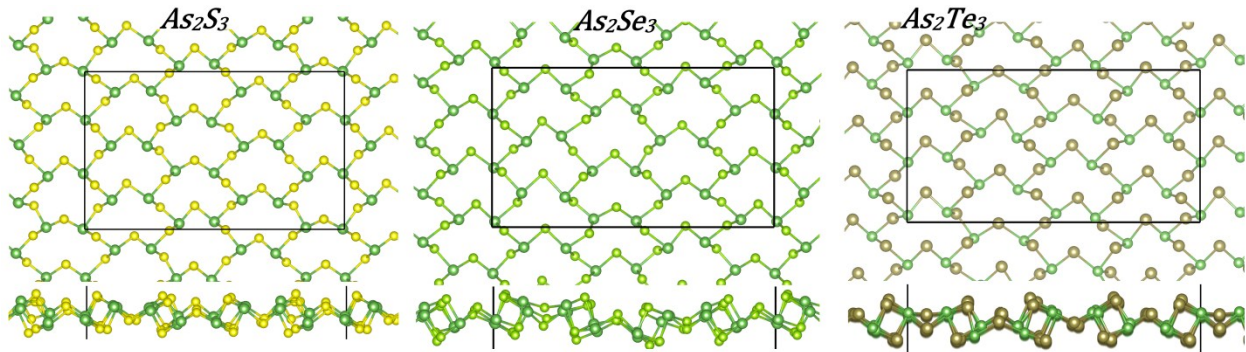

**Fig. S2**, Top and side views of studied monolayers after the AIMD simulations for 13 ps.

3- PBE results for the electronic band structures of monolayers with and without SOC.

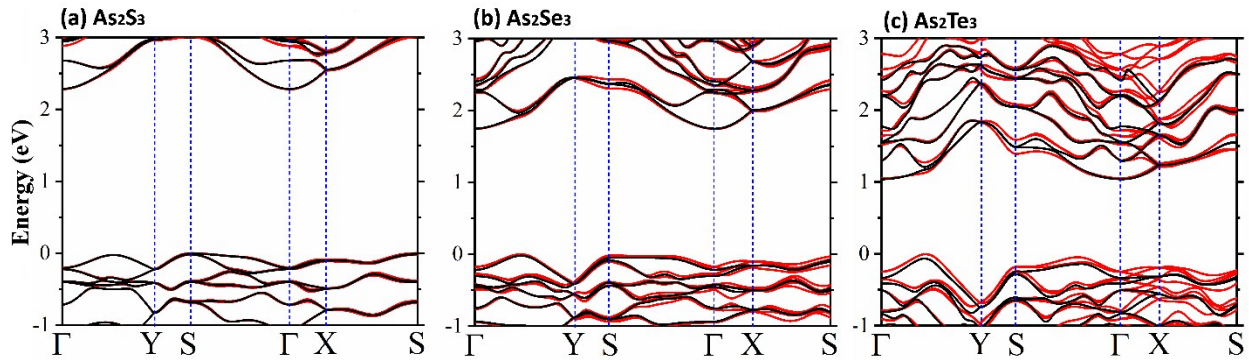

**Fig. S3**, PBE results for the electronic band structures of  $\text{As}_2\text{S}_3$ ,  $\text{As}_2\text{Se}_3$  and  $\text{As}_2\text{Te}_3$  monolayer with SOC (red lines) and without SOC (black lines).

4- HSE06 results for the electronic band structures of bulk systems.

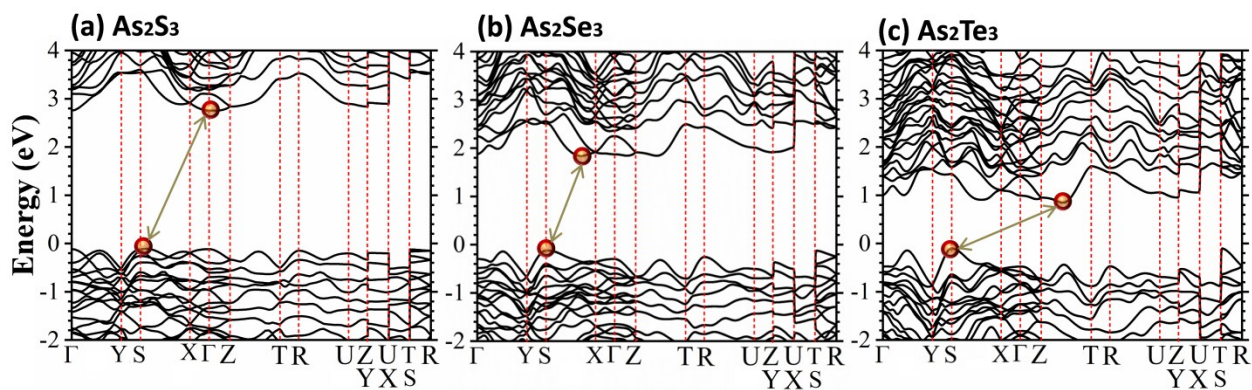

Fig. S4, HSE06 results for the electronic band structures of bulk  $\text{As}_2\text{S}_3$ ,  $\text{As}_2\text{Se}_3$  and  $\text{As}_2\text{Te}_3$ .

5- Charge density distributions of VBM and CBM states of  $\text{As}_2\text{Se}_3$  and  $\text{As}_2\text{Te}_3$  monolayers.

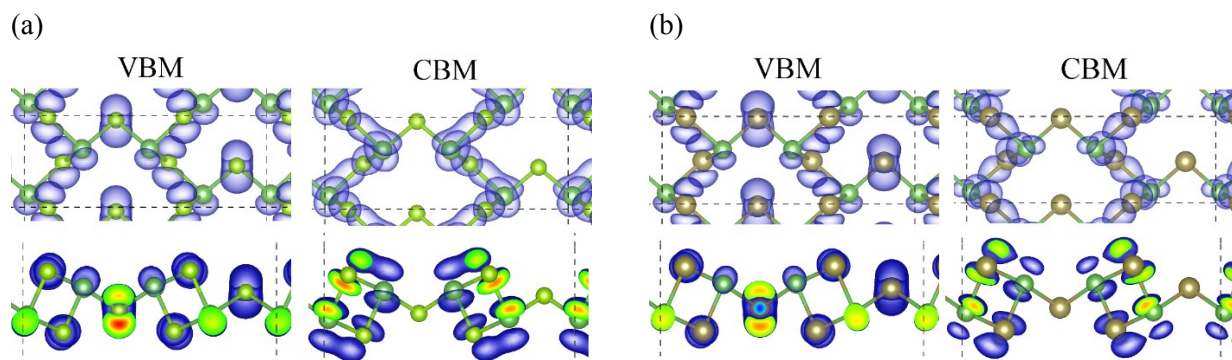

Fig. S5, HSE06 calculated charge density distributions of VBM and CBM states of (a)  $\text{As}_2\text{Se}_3$  and (b)  $\text{As}_2\text{Te}_3$  monolayers. The iso-surface value is set to  $0.003 \text{ e}/\text{\AA}^3$ .
